# Supplementary material for: Evaluation of Chickpea Varieties and Fungicides for the Management of Chickpea Fusarium Wilt Disease (Fusarium oxysporum f.sp. ciceris) at Adet Sick Plot in Northwest Ethiopia
Source: Hindawi journal article supplement (doi:10.1155/2018/6015205), 2018-12-18
Supplement: f1 [file 6015205.f1.zip]

Archive with 4 entries (4 files):
- 6015205.f1/Arranged Data for ANOVA  by SAS.xlsx
- 6015205.f1/AUDPC for figure 3 and 4.xlsx
- 6015205.f1/Row data for figure 1 disease progress.xlsx
- 6015205.f1/Row data for figure 2 disease progress.xlsx
