# Supplementary material for: Evaluation of Chickpea Varieties and Fungicides for the Management of Chickpea Fusarium Wilt Disease (Fusarium oxysporum f.sp. ciceris) at Adet Sick Plot in Northwest Ethiopia
Source: Hindawi journal article supplement (doi:10.1155/2018/6015205), 2018-12-18
Supplement: f1 [file 6015205.f1.zip › 6015205.f1/Arranged Data for ANOVA by SAS.xlsx]

## Sheet: Sheet2
	Data RCBD;
	input REP var$ che$ DE SC PH DI DF DPM DM SCH PP HSW GY BY;
	cards;
	Replication	Variety	Fungicides	DE	SCG	PH	DI	DF	DPM	DM	SCH	PP	HSW	GY (t/ha)	BY(t/ha)	HI
	1	Shasho	Untreated	20	87	40	54.1	63	90	124	40	65	27	2.808	4.228	66.4
	1	Shasho	Mancozeb	19	78	48	35.9	65	93	122	50	67	25.8	3.631	5.28	68.8
	1	Shasho	Apron star	19	79	45	17.7	58	90	122	65	68	30.2	3.625	5.029	72.1
	1	Arerti	Untreated	14	95	39	78.9	55	85	118	35	57	24	1.5045	2.615	57.5
	1	Arerti	Mancozeb	16	75	41	66.7	60	85	122	25	59	24.7	1.853	3.445	53.8
	1	Arerti	Apron star	15	89	44	61.8	53	88	122	34	61	23.6	2.1555	3.704	58.2
	1	Marye	Untreated	12	87	28	59.8	53	80	110	35	49	21	1.2865	2.009	64
	1	Marye	Mancozeb	10	76	26	47.4	56	78	112	40	48	23.3	1.789	3.049	58.7
	1	Marye	Apron star	9	78	30	42.3	55	78	112	45	58	22	1.551	2.52	61.5
	1	Local	Untreated	9	93	33	96.8	48	80	104	3	40	13.8	0.5545	1.39	39.9
	1	Local	Mancozeb	9	100	36	85	50	80	105	15	39	15	0.78	1.5875	49.1
	1	Local	Apron star	9	95	34	63.1	51	85	105	35	39	15.3	1.2	2.049	58.6
	2	Shasho	Untreated	19	90	42	57.8	65	94	122	38	59	26	2.301	3.9625	58.1
	2	Shasho	Mancozeb	22	94	40	36.2	63	94	122	60	69	28	3.732	5.403	69.1
	2	Shasho	Apron star	18	75	49	13.3	58	90	125	65	73	27.8	3.8205	5.629	67.9
	2	Arerti	Untreated	12	89	41	60.7	55	85	120	35	55	25.8	1.561	2.995	52.1
	2	Arerti	Mancozeb	15	72	44	58.3	53	85	122	30	55	23.6	1.6875	3.175	53.1
	2	Arerti	Apron star	14	93	47	50.5	63	85	120	46	65	25	2.6	3.968	65.5
	2	Marye	Untreated	13	94	35	90.5	55	78	112	9	43	21.6	0.6	1.4675	40.9
	2	Marye	Mancozeb	11	90	34	55.6	56	76	110	40	49	24	1.6495	3.005	54.9
	2	Marye	Apron star	10	100	29	35	55	76	110	65	56	22.3	2.5095	3.514	71.4
	2	Local	Untreated	8	99	31	83.8	50	80	105	16	40	15.5	0.6775	1.49	45.5
	2	Local	Mancozeb	10	88	33	79.5	50	80	105	18	41	13.6	0.6745	1.52	44.4
	2	Local	Apron star	11	92	36	98.3	48	85	103	20	42	17.2	0.6775	1.73	39.2
	3	Shasho	Untreated	18	86	42	65.1	60	92	125	30	62	29	1.978	3.46	57.2
	3	Shasho	Mancozeb	17	87	38	34.5	60	92	124	57	65	25.3	3.536	4.9075	72.1
	3	Shasho	Apron star	15	79	48	11.4	63	94	120	70	75	28.3	3.9775	6.025	66
	3	Arerti	Untreated	14	91	39	67	63	88	120	30	58	27	1.566	2.974	52.7
	3	Arerti	Mancozeb	13	85	42	64.7	60	88	120	30	59	25.5	1.7545	3.429	51.2
	3	Arerti	Apron star	13	89	40	28.1	55	85	118	70	63	25.4	2.9905	4.47	66.9
	3	Marye	Untreated	10	100	31	60	58	80	110	30	45	23	1.1385	1.98	57.5
	3	Marye	Mancozeb	12	100	30	40	50	80	112	60	53	22.8	1.7185	2.99	57.5
	3	Marye	Apron star	11	97	28	22.7	55	80	112	75	53	23.5	2.589	3.7935	68.2
	3	Local	Untreated	8	98	33	86.7	53	83	104	13	41	16	0.541	1.329	40.7
	3	Local	Mancozeb	8	100	34	80	53	80	103	20	43	14.8	1.0535	1.98	53.2
	3	Local	Apron star	8	100	39	72	48	85	105	28	40	16.5	0.5545	1.434	38.7
	;
	PROC GLM;
	CLASS REP var che;
	MODEL DE SCG PH DI DF DPM DM SCH PP HSW GY BY=REP var che var*che;
	MEANS REP var che var*che/LSD;
	RUN;
		Note: DE= Days to emergency, SCG= Stand count at germination, PH=Plant height, DI=Disease incidence, DF=Days to flowering, DPM= Days to physiological maturity
		DM=Days to maturity, SCH= Stand count at harvest, PP=Number of pod per plant, HSW=Hundred seed weight, GY= Grain yield and BY= Biomass yield

## Sheet: Sheet1
	replication	Treatment Code	Days to emergency	stand count at germ	PH%age	DI%age	DS%age	Days to.F	Days to. PM	Days to M	S.C.H	No pod/plant	No seed/plant	100 seed w(g/polt)	yield g/plot	Grain.y(kg/ha)	Bio.yield g/plot	Harvest index
	1	1	20	87	40	54.1		63	90	124	40	65	65	27	561.6	2808	845.6
	1	2	19	78	48	35.9		65	93	122	50	67	67	25.8	726.2	3631	1056
	1	3	19	79	45	17.7		58	90	122	65	68	68	30.2	725	3625	1005.8
	1	4	14	95	39	78.9		55	85	118	35	57	57	24	300.9	1504.5	523
	1	5	16	75	41	66.7		60	85	122	25	59	59	24.7	370.6	1853	689
	1	6	15	89	44	61.8		53	88	122	34	61	61	23.6	431.1	2155.5	740.8
	1	7	12	87	28	59.8		53	80	110	35	49	49	21	257.3	1286.5	401.8
	1	8	10	76	26	47.4		56	78	112	40	48	48	23.3	357.8	1789	609.8
	1	9	9	78	30	42.3		55	78	112	45	58	58	22	310.2	1551	504
	1	10	9	93	33	96.8		48	80	104	3	40	40	13.8	110.9	554.5	278
	1	11	9	100	36	85		50	80	105	15	39	39	15	156	780	317.5
	1	12	9	95	34	63.1		51	85	105	35	39	39	15.3	240	1200	409.8
	2	1	19	90	42	57.8		65	94	122	38	59	59	26	460.2	2301	792.5
	2	2	1900-01-22	94	40	36.2		63	94	122	60	69	69	28	746.4	3732	1080.6
	2	3	18	75	49	13.3		58	90	125	65	73	73	27.8	764.1	3820.5	1125.8
	2	4	12	89	41	60.7		55	85	120	35	55	55	25.8	312.2	1561	599
	2	5	15	72	44	58.3		53	85	122	30	55	55	23.6	337.5	1687.5	635
	2	6	14	93	47	50.5		63	85	120	46	65	65	25	520	2600	793.6
	2	7	13	94	35	90.5		55	78	112	9	43	52	21.6	120	600	293.5
	2	8	11	90	34	55.6		56	76	110	40	49	49	24	329.9	1649.5	601
	2	9	10	100	29	35		55	76	110	65	56	56	22.3	501.9	2509.5	702.8
	2	10	8	99	31	83.8		50	80	105	16	40	40	15.5	135.5	677.5	298
	2	11	10	88	33	79.5		50	80	105	18	41	41	13.6	134.9	674.5	304
	2	12	11	92	36	98.3		48	85	103	20	42	42	17.2	135.5	677.5	346
	3	1	18	86	42	65.1		60	92	125	30	62	62	29	395.6	1978	692
	3	2	17	87	38	34.5		60	92	124	57	65	65	25.3	707.2	3536	981.5
	3	3	15	79	48	11.4		63	94	120	70	75	75	28.3	795.5	3977.5	1205
	3	4	14	91	39	67		63	88	120	30	58	58	27	313.2	1566	594.8
	3	5	13	85	42	64.7		60	88	120	30	59	59	25.5	350.9	1754.5	685.8
	3	6	13	89	40	28.1		55	85	118	70	63	63	25.4	598.1	2990.5	894
	3	7	10	100	31	60		58	80	110	30	45	45	23	227.7	1138.5	396
	3	8	12	100	30	40		50	80	112	60	53	53	22.8	343.7	1718.5	598
	3	9	11	97	28	22.7		55	80	112	75	53	53	23.5	517.8	2589	758.7
	3	10	8	98	33	86.7		53	83	104	13	41	41	16	108.2	541	265.8
	3	11	8	100	34	80		53	80	103	20	43	43	14.8	210.7	1053.5	396
	3	12	8	100	39	72		48	85	105	28	40	40	16.5	110.9	554.5	286.8

## Sheet: Sheet3
		REP	variety	chemical	PP	SP	SP
		1	Shasho	no chemical	65	1	65
		1	Shasho	Mancozeb	67	1	67
		1	Shasho	Apron star	68	1	68
		1	Arerti	no chemical	57	1	57
		1	Arerti	Mancozeb	59	1	59
		1	Arerti	Apron star	61	1	61
		1	Marye	no chemical	49	1	49
		1	Marye	Mancozeb	48	1	48
		1	Marye	Apron star	58	1	58
		1	Local	no chemical	40	1	40
		1	Local	Mancozeb	39	1	39
		1	Local	Apron star	39	1	39
		2	Shasho	no chemical	59	1	59
		2	Shasho	Mancozeb	69	1	69
		2	Shasho	Apron star	73	1	73
		2	Arerti	no chemical	55	1	55
		2	Arerti	Mancozeb	55	1	55
		2	Arerti	Apron star	65	1	65
		2	Marye	no chemical	43	1	52
		2	Marye	Mancozeb	49	1	49
		2	Marye	Apron star	56	1	56
		2	Local	no chemical	40	1	40
		2	Local	Mancozeb	41	1	41
		2	Local	Apron star	42	1	42
		3	Shasho	no chemical	62	1	62
		3	Shasho	Mancozeb	65	1	65
		3	Shasho	Apron star	75	1	75
		3	Arerti	no chemical	58	1	58
		3	Arerti	Mancozeb	59	1	59
		3	Arerti	Apron star	63	1	63
		3	Marye	no chemical	45	1	45
		3	Marye	Mancozeb	53	1	53
		3	Marye	Apron star	53	1	53
		3	Local	no chemical	41	1	41
		3	Local	Mancozeb	43	1	43
		3	Local	Apron star	40	1	40

## Sheet: Sheet4
				data rcbd;
				input REP var$ che$ DE SC PH DI DF DPM DM SCH PP SP SW YLD BY;
				cards;
			REP	variety	chemical	DI
			1	Shasho	no chemical	44.1
			1	Shasho	Mancozeb	35.9
			1	Shasho	Apron star	17.7
			1	Arerti	no chemical	78.9
			1	Arerti	Mancozeb	66.7
			1	Arerti	Apron star	61.8
			1	Marye	no chemical	59.8
			1	Marye	Mancozeb	47.4
			1	Marye	Apron star	42.3
			1	Local	no chemical	96.8
			1	Local	Mancozeb	85
			1	Local	Apron star	63.1
			2	Shasho	no chemical	47.8
			2	Shasho	Mancozeb	36.2
			2	Shasho	Apron star	13.3
			2	Arerti	no chemical	60.7
			2	Arerti	Mancozeb	58.3
			2	Arerti	Apron star	50.5
			2	Marye	no chemical	90.5
			2	Marye	Mancozeb	55.6
			2	Marye	Apron star	35
			2	Local	no chemical	83.8
			2	Local	Mancozeb	79.5
			2	Local	Apron star	98.3
			3	Shasho	no chemical	45.1
			3	Shasho	Mancozeb	34.5
			3	Shasho	Apron star	11.4
			3	Arerti	no chemical	67
			3	Arerti	Mancozeb	64.7
			3	Arerti	Apron star	28.1
			3	Marye	no chemical	60
			3	Marye	Mancozeb	40
			3	Marye	Apron star	22.7
			3	Local	no chemical	86.7
			3	Local	Mancozeb	80
			3	Local	Apron star	72
