# Supplementary material for: Evaluation of Chickpea Varieties and Fungicides for the Management of Chickpea Fusarium Wilt Disease (Fusarium oxysporum f.sp. ciceris) at Adet Sick Plot in Northwest Ethiopia
Source: Hindawi journal article supplement (doi:10.1155/2018/6015205), 2018-12-18
Supplement: f1 [file 6015205.f1.zip › 6015205.f1/AUDPC for figure 3 and 4.xlsx]

## Sheet: Sheet1
	When we calculate Area under disease progress curve (AUDPC)
			Row data for figure 4
			AUDPC Shasho Apron star = ((SA37+SA30)/2)*(37-30)+((SA44+SA37)/2)*(44-37)+((SA51+SA44)/2)*(51- 44)+((SA58+SA51)/2)*(58-51)+((SA65+SA58)/2)*(65-58)+((SA72+SA65)/2*(72-65)+((SA79+SA72)/2*(79-72), and continues on for each of the treatment groups
	Days After Sowing	Shasho Apron star	Shasho Mancozeb	Shasho untreated	Arerti Apron star	Arerti Mancozeb	Arerti untreated	Marye Apron star	Marye Mancozeb	Marye untreated	Local Apron star	Local Mancozeb	Local Untreated
	30DAS	1	1	1	1	3	3	2	3	4	1	2	4
	37DAS	3	4	6	4	7	13	4	8	24	4	8	16
	44DAS	5	6	10	6	12	19	7	13	26	12	14	26
	51DAS	6	8	15	7	17	23	9	18	32	16	24	36
	58DAS	7	9	19	9	22	26	11	22	38	22	30	42
	65DAS	8	11	24	10	25	29	14	24	40	26	34	48
	72DAS	9	12	28	12	29	35	16	26	43	28	36	52
	79DAS	10	14	32	16	33	38	18	30	44	32	40	54
	AUDPC	147	185.5	216	172.5	189.5	234.5	206	259.5	295.5	517.5	543.8	578.5
		Number indicates the disease incidence with 7 days interval
		Treatment	AUDPC
		Shasho apron star	147
		Shasho mancozeb	185.5
		Shasho no chemical	216
		Arerti apron star	172.5
		Arerti mancozeb	189.5
		Arerti no chemical	234.5
		Marye apron star	206
		Marye mancozeb	259.5
		Marye no chemical	295.5
		Local apron star	517.5
		Local mancozeb	543.8
		Local no chemical	578.5
		Row data for figure 3
		Varaities	AUDPC%-days
		Shaho	154.5
		Arerti	149.7
		Marye	245.6
		Local	418.5
		Fungicides	AUDPC%-days
		Apron satr	152.5
		Mancozeb	206.5
		Untreated	405.8

## Sheet: Sheet2
		Treatment	AUDPC
		Shasho apron star	147
		Shasho mancozeb	185.5
		Shasho no chemical	216
		Arerti apron star	172.5
		Arerti mancozeb	189.5
		Arerti no chemical	234.5
		Marye apron star	206
		Marye mancozeb	259.5
		Marye no chemical	295.5
		Local apron star	517.5
		Local mancozeb	543.8
		Local no chemical	578.5
