# Supplementary material for: Evaluation of Chickpea Varieties and Fungicides for the Management of Chickpea Fusarium Wilt Disease (Fusarium oxysporum f.sp. ciceris) at Adet Sick Plot in Northwest Ethiopia
Source: Hindawi journal article supplement (doi:10.1155/2018/6015205), 2018-12-18
Supplement: f1 [file 6015205.f1.zip › 6015205.f1/Row data for figure 1 disease progress.xlsx]

## Sheet: Sheet1
		Row data for disease incidence progress at 7 days interval the effect of different variety with the same fungicides
			Shasho Untreated	Arerti Untreated	Marye Untreated	Local Untreated
		30DAS	1	3	4	5
		37DAS	6	13	24	20
		44DAS	10	19	27	39
		51DAS	15	23	33	45
		58DAS	19	26	38	47
		65DAS	24	29	40	50
		72DAS	28	35	43	55
		79DAS	32	38	44	58
			Shasho Mancozeb	Arerti Mancozeb	Marye Mancozeb	Local Mancozeb
		30DAS	0	1	3	6
		37DAS	1	4	8	13
		44DAS	3	7	13	18
		51DAS	6	10	18	22
		58DAS	9	13	22	26
		65DAS	11	15	25	30
		72DAS	12	17	27	33
		79DAS	14	19	29	38
			Shasho Apron star	Arerti Apron star	Marye Apron star	Local Apron star
		30DAS	0	1	2	3
		37DAS	2	3	5	9
		44DAS	4	5	8	14
		51DAS	5	7	11	17
		58DAS	6	9	14	20
		65DAS	7	10	16	23
		72DAS	8	12	18	26
		79DAS	9	14	19	28
		Note: Numbers indicate disease incidence progress in 7 days interval
			DAS= Days after sowing
