# Supplementary material for: Evaluation of Chickpea Varieties and Fungicides for the Management of Chickpea Fusarium Wilt Disease (Fusarium oxysporum f.sp. ciceris) at Adet Sick Plot in Northwest Ethiopia
Source: Hindawi journal article supplement (doi:10.1155/2018/6015205), 2018-12-18
Supplement: f1 [file 6015205.f1.zip › 6015205.f1/Row data for figure 2 disease progress.xlsx]

## Sheet: Sheet1
			Row data for disease incidence progress at 7 days interval the effect of different fungicides with the same chickpea variety
				Shasho Apron star	Shasho Mancozeb	Shasho Untreated
			30DAS	1	1	1
			37DAS	1	2	4
			44DAS	3	3	6
			51DAS	4	4	11
			58DAS	5.5	5	12
			65DAS	6.5	7	13
			72DAS	7.8	8	15
			79DAS	8.6	10	17
				Arerti Apron satr	Arerti Mancozeb	Arerti Untreated
			30DAS	1	1	3
			37DAS	4	5	4
			44DAS	6	7	7
			51DAS	10	8	9
			58DAS	12	9	12
			65DAS	15	10	14
			72DAS	16	12	15
			79DAS	18.7	14	16
				Marye Apron star	Marye Mancozeb	Marye Untreated
			30DAS	1	1	1
			37DAS	3	3	4
			44DAS	6	4	6
			51DAS	8	5	7
			58DAS	12	6	8
			65DAS	14	6	8
			72DAS	15	8	9
			79DAS	18.7	9	10
				Local Apron star	Local Mancozeb	Local Un treated
			30DAS	1	3	4
			37DAS	5	8	16
			44DAS	10	14	26
			51DAS	16	24	35
			58DAS	22	29	43
			65DAS	25	32	47
			72DAS	28	36	51
			79DAS	30.5	37.3	53
			Note: Numbers indicate disease incidence progress in 7 days interval
				DAS= Days after sowing
